# Supplementary material
Source: Springer Nature journal article supplement (https://www.springermedizin.de/resource/supplementary/13075_2010_9714_MOESM4_ESM.pdf/9693360)

(a)

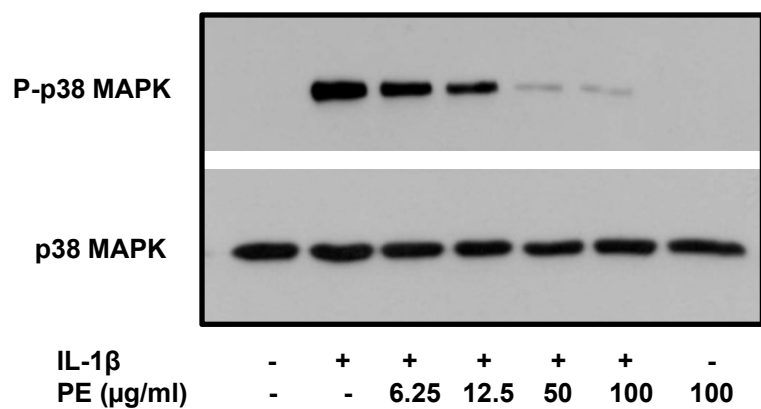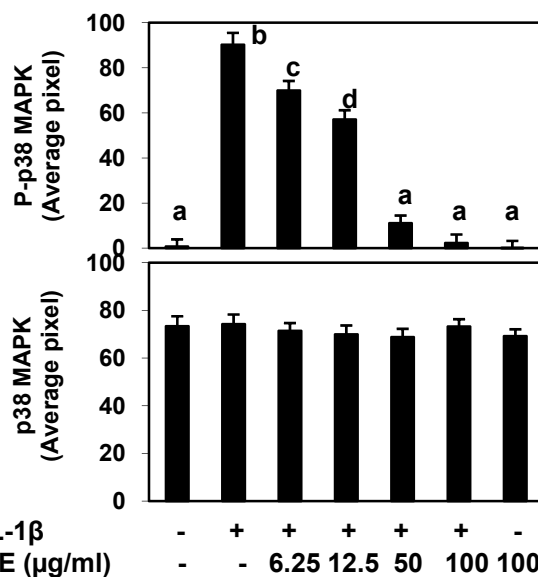

(b)

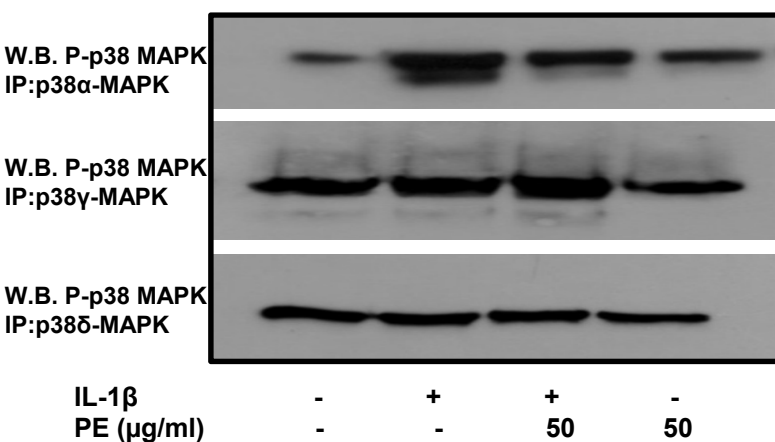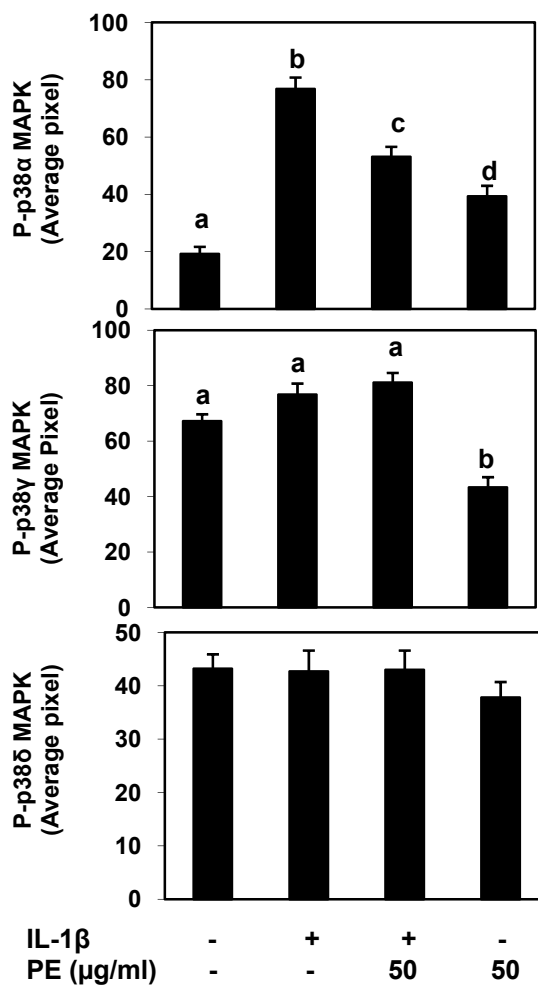

Supplement: MOESM4 [file 9693360]
